# Supplementary material for: Protein Scaffolds Can Enhance the Bistability of Multisite Phosphorylation Systems
Source: PubMed Central journal article supplement (PMC3380838; doi:10.1371/journal.pcbi.1002551), 2012-06-21
Supplement: pcbi.1002551.s001.pdf [file pcbi.1002551.s001.pdf]

**Table S1: Parameter set for Figure 4A,4B**

The following is the set of parameters used in Figure 4A and 4B, i.e. they are parameter values such that MA-S is bistable but MA-NS is not.

|                |                 | $i = 0$            | $i = 1$                   | $i = 2$        |
|----------------|-----------------|--------------------|---------------------------|----------------|
| $a_i^E$        | $nM^{-1}s^{-1}$ | $10^{-3}$          | $4 \times 10^{-2}$        | —              |
| $b_i^E$        | $s^{-1}$        | 50                 | $4 \times 10^{-3}$        | —              |
| $a_i^F$        | $nM^{-1}s^{-1}$ | —                  | $4 \times 10^{-3}$        | $10^{-3}$      |
| $b_i^F$        | $s^{-1}$        | —                  | 300                       | 50             |
| $c_i$          | $s^{-1}$        | $10^{-2}$          | $10^3$                    | —              |
| $d_i$          | $s^{-1}$        | —                  | $10^{-2}$                 | 9              |
| $k_{M,i}^E$    | $nM$            | 50010              | 25000.1                   | —              |
| $k_{M,i}^F$    | $nM$            | -                  | 75002.5                   | 59000          |
| $k_i^a$        | $nM^{-1}s^{-1}$ | $4 \times 10^{-1}$ | 10                        | 6              |
| $k_i^d$        | $s^{-1}$        | $2 \times 10^{-3}$ | 90                        | $10^3$         |
| Concentrations | $nM$            | $F_{tot} = 1$      | $B_{tot} = 4 \times 10^3$ | $S_{tot} = 50$ |
