# Supplementary material for: Protein Scaffolds Can Enhance the Bistability of Multisite Phosphorylation Systems
Source: PubMed Central journal article supplement (PMC3380838; doi:10.1371/journal.pcbi.1002551), 2012-06-21
Supplement: pcbi.1002551.s002.pdf [file pcbi.1002551.s002.pdf]

**Table S2: Parameter sets for Figure 4C**

Using the analysis in Text S1 Section 2.3, the following are the parameter sets used in Figure 4C, such that as  $k_M$  becomes larger, the dose response curve for MA-S system is approximately that for LR-S.

Parameter set of dose response for LR-S:

|                |                 | $i = 0$            | $i = 1$                   | $i = 2$                     |
|----------------|-----------------|--------------------|---------------------------|-----------------------------|
| $\alpha_i$     | $nM^{-1}s^{-1}$ | $7 \times 10^{-2}$ | $4 \times 10^{-2}$        | —                           |
| $\delta_i$     | $nM^{-1}s^{-1}$ | —                  | $4 \times 10^{-1}$        | $1.3 \times 10^{-3}$        |
| $k_i^a$        | $nM^{-1}s^{-1}$ | 160                | 20                        | $2 \times 10^{-2}$          |
| $k_i^d$        | $s^{-1}$        | $8 \times 10^{-2}$ | 750                       | 450                         |
| Concentrations | $nM$            | $F_{tot}=1.87$     | $B_{tot} = 2 \times 10^3$ | $S_{tot} = 1.2 \times 10^3$ |

Parameter set for MA-S dose response,  $k_M \approx 100$

|             |                 | $i = 0$               | $i = 1$               | $i = 2$               |
|-------------|-----------------|-----------------------|-----------------------|-----------------------|
| $a_i^E$     | $nM^{-1}s^{-1}$ | $6.91 \times 10^{-1}$ | $2.48 \times 10^{-1}$ | —                     |
| $b_i^E$     | $s^{-1}$        | $1.63 \times 10^1$    | 5.90                  | —                     |
| $a_i^F$     | $nM^{-1}s^{-1}$ | —                     | $9.56 \times 10^{-1}$ | $5.80 \times 10^{-3}$ |
| $b_i^F$     | $s^{-1}$        | —                     | $1.86 \times 10^1$    | $4.85 \times 10^{-2}$ |
| $c_i$       | $s^{-1}$        | 1.83                  | 1.13                  | —                     |
| $d_i$       | $s^{-1}$        | —                     | $1.34 \times 10^1$    | $1.40 \times 10^{-2}$ |
| $k_{M,i}^E$ | $nM$            | $2.61 \times 10^1$    | $2.82 \times 10^1$    | —                     |
| $k_{M,i}^F$ | $nM$            | -                     | $3.35 \times 10^1$    | $1.08 \times 10^1$    |

Parameter set for MA-S dose response,  $k_M \approx 1000$ :

|             |                 | $i = 0$               | $i = 1$               | $i = 2$               |
|-------------|-----------------|-----------------------|-----------------------|-----------------------|
| $a_i^E$     | $nM^{-1}s^{-1}$ | $2.78 \times 10^{-1}$ | $4.0 \times 10^{-2}$  | —                     |
| $b_i^E$     | $s^{-1}$        | $5.1 \times 10^{-1}$  | $1.32 \times 10^{-1}$ | —                     |
| $a_i^F$     | $nM^{-1}s^{-1}$ | —                     | $4.0 \times 10^{-1}$  | $1.3 \times 10^{-3}$  |
| $b_i^F$     | $s^{-1}$        | —                     | $9.45 \times 10^{-1}$ | $6.65 \times 10^{-3}$ |
| $c_i$       | $s^{-1}$        | $5.71 \times 10^1$    | $1.75 \times 10^1$    | —                     |
| $d_i$       | $s^{-1}$        | —                     | $3.04 \times 10^2$    | $3.99 \times 10^{-1}$ |
| $k_{M,i}^E$ | $nM$            | $8.15 \times 10^2$    | $4.37 \times 10^2$    | —                     |
| $k_{M,i}^F$ | $nM$            | -                     | $7.60 \times 10^2$    | $3.00 \times 10^2$    |

Parameter set for MA-S dose response,  $k_M \approx 3000$ :

|             |                 | $i = 0$               | $i = 1$               | $i = 2$               |
|-------------|-----------------|-----------------------|-----------------------|-----------------------|
| $a_i^E$     | $nM^{-1}s^{-1}$ | $1.57 \times 10^{-1}$ | $4.24 \times 10^{-2}$ | —                     |
| $b_i^E$     | $s^{-1}$        | $5.38 \times 10^2$    | $6.92 \times 10^1$    | —                     |
| $a_i^F$     | $nM^{-1}s^{-1}$ | —                     | $9.78 \times 10^{-1}$ | $2.02 \times 10^{-3}$ |
| $b_i^F$     | $s^{-1}$        | —                     | $1.01 \times 10^4$    | $1.01 \times 10^1$    |
| $c_i$       | $s^{-1}$        | $4.33 \times 10^2$    | $1.15 \times 10^3$    | —                     |
| $d_i$       | $s^{-1}$        | —                     | $6.95 \times 10^3$    | $1.83 \times 10^1$    |
| $k_{M,i}^E$ | $nM$            | $6.18 \times 10^3$    | $2.87 \times 10^4$    | —                     |
| $k_{M,i}^F$ | $nM$            | -                     | $1.74 \times 10^4$    | $1.41 \times 10^4$    |
